# Supplementary material
Source: MDPI journal article supplement (https://www.mdpi.com/2076-3417/13/13/7425)
Supplement: s1 [file s1]

## SUPPLEMENTARY MATERIAL

**Table S1.** Mean and standard deviation (Mean  $\pm$  SD), and minimum (Min) and maximum (Max) of Ca, Fe, Mg, Na, P and Rb determined in Freisa wines from Asti (FA), Chieri (FC), Colli Tortonesi (CTF), Langhe (LF) and Monferrato (MF) sites. All values are expressed in mg/L.

| Site     |               | Ca                       | Fe                         | Mg                       | Na                       | P                          | Rb                          |
|----------|---------------|--------------------------|----------------------------|--------------------------|--------------------------|----------------------------|-----------------------------|
| FA       | Mean $\pm$ SD | 49 <sup>a</sup> $\pm$ 9  | 1.9 <sup>b</sup> $\pm$ 0.5 | 54 <sup>a</sup> $\pm$ 5  | 6 <sup>a</sup> $\pm$ 2   | 143 <sup>a</sup> $\pm$ 30  | 2.2 <sup>ab</sup> $\pm$ 0.5 |
|          | Min – Max     | 28 – 67                  | 1.3 – 3.1                  | 49 – 67                  | 4 – 13                   | 95 – 202                   | 1.3 – 3.1                   |
| FC       | Mean $\pm$ SD | 47 <sup>a</sup> $\pm$ 7  | 1.9 <sup>b</sup> $\pm$ 0.6 | 52 <sup>a</sup> $\pm$ 6  | 6 <sup>a</sup> $\pm$ 3   | 124 <sup>ab</sup> $\pm$ 24 | 2.5 <sup>ab</sup> $\pm$ 0.5 |
|          | Min – Max     | 34 – 57                  | 1.2 – 3.2                  | 44 – 63                  | 3 – 12                   | 101 – 177                  | 1.9 – 3.7                   |
| CTF      | Mean $\pm$ SD | 41 <sup>a</sup> $\pm$ 9  | 4 <sup>a</sup> $\pm$ 4     | 54 <sup>a</sup> $\pm$ 11 | 12 <sup>a</sup> $\pm$ 10 | 100 <sup>b</sup> $\pm$ 25  | 1.7 <sup>c</sup> $\pm$ 0.7  |
|          | Min – Max     | 30 – 51                  | 2 – 12                     | 41 – 72                  | 5 – 25                   | 72 – 131                   | 0.9 – 2.6                   |
| LF       | Mean $\pm$ SD | 47 <sup>a</sup> $\pm$ 11 | 1.7 <sup>b</sup> $\pm$ 0.3 | 53 <sup>a</sup> $\pm$ 8  | 8 <sup>a</sup> $\pm$ 6   | 139 <sup>a</sup> $\pm$ 34  | 2.2 <sup>bc</sup> $\pm$ 0.3 |
|          | Min – Max     | 33 – 75                  | 1.3 – 2.2                  | 45 – 77                  | 2 – 25                   | 71 – 189                   | 1.6 – 2.7                   |
| MF       | Mean $\pm$ SD | 45 <sup>a</sup> $\pm$ 4  | 1.9 <sup>b</sup> $\pm$ 0.3 | 54 <sup>a</sup> $\pm$ 6  | 9 <sup>a</sup> $\pm$ 12  | 128 <sup>ab</sup> $\pm$ 26 | 2.6 <sup>a</sup> $\pm$ 0.7  |
|          | Min – Max     | 41 – 56                  | 1.6 – 2.5                  | 44 – 60                  | 3 – 42                   | 80 – 156                   | 1.9 – 4.0                   |
| <i>F</i> |               | n.s.                     | 3.433 *                    | n.s.                     | n.s.                     | 2.786 *                    | 3.575 *                     |

\*\*\* Significant for  $p < 0.001$ ; \*\* Significant for  $p < 0.01$ ; \* Significant for  $p < 0.05$ ; ° Significant for  $p < 0.1$ ; n.s.: not significant. F: calculated Fischer's F. Data followed by different letters in the same column are significantly different (LSD test at  $p \leq 0.05$ ).

**Table S2.** Mean and standard deviation (Mean  $\pm$  SD), and minimum (Min) and maximum (Max) of Al, Ba, Cr, Cu and Mn determined in Freisa wines from Asti (FA), Chieri (FC), Colli Tortonesi (CTF), Langhe (LF) and Monferrato (MF) sites. All values are expressed in  $\mu\text{g/L}$ .

| Site     |               | Al                          | Ba                        | Cr                        | Cu                         | Mn                          |
|----------|---------------|-----------------------------|---------------------------|---------------------------|----------------------------|-----------------------------|
| FA       | Mean $\pm$ SD | 426 <sup>a</sup> $\pm$ 170  | 61 <sup>ab</sup> $\pm$ 19 | 139 <sup>b</sup> $\pm$ 13 | 439 <sup>a</sup> $\pm$ 133 | 614 <sup>a</sup> $\pm$ 135  |
|          | Min – Max     | 175 – 676                   | 29 – 93                   | 122 – 167                 | 270 – 720                  | 392 – 930                   |
| FC       | Mean $\pm$ SD | 360 <sup>ab</sup> $\pm$ 169 | 58 <sup>ab</sup> $\pm$ 16 | 137 <sup>b</sup> $\pm$ 9  | 423 <sup>a</sup> $\pm$ 117 | 603 <sup>a</sup> $\pm$ 138  |
|          | Min – Max     | 112 – 624                   | 24 – 71                   | 122 – 148                 | 223 – 592                  | 360 – 830                   |
| CTF      | Mean $\pm$ SD | 363 <sup>ab</sup> $\pm$ 170 | 54 <sup>ab</sup> $\pm$ 22 | 151 <sup>a</sup> $\pm$ 5  | 361 <sup>a</sup> $\pm$ 77  | 392 <sup>b</sup> $\pm$ 246  |
|          | Min – Max     | 173 – 551                   | 27 – 79                   | 144 – 159                 | 290 – 479                  | 192 – 856                   |
| LF       | Mean $\pm$ SD | 258 <sup>b</sup> $\pm$ 70   | 49 <sup>b</sup> $\pm$ 13  | 144 <sup>ab</sup> $\pm$ 6 | 438 <sup>a</sup> $\pm$ 151 | 564 <sup>ab</sup> $\pm$ 182 |
|          | Min – Max     | 151 – 379                   | 28 – 74                   | 133 – 157                 | 274 – 710                  | 338 – 995                   |
| MF       | Mean $\pm$ SD | 325 <sup>ab</sup> $\pm$ 161 | 72 <sup>a</sup> $\pm$ 29  | 150 <sup>a</sup> $\pm$ 7  | 350 <sup>a</sup> $\pm$ 73  | 604 <sup>a</sup> $\pm$ 221  |
|          | Min – Max     | 149 – 589                   | 41 – 128                  | 143 – 160                 | 280 – 495                  | 328 – 882                   |
| <i>F</i> |               | 2.253 <sup>°</sup>          | n.s.                      | 4.207 **                  | n.s.                       | n.s.                        |

\*\*\* Significant for  $p < 0.001$ ; \*\* Significant for  $p < 0.01$ ; \* Significant for  $p < 0.05$ ; <sup>°</sup> Significant for  $p < 0.1$ ; n.s.: not significant. F: calculated Fischer's F. Data followed by different letters in the same column are significantly different (LSD test at  $p \leq 0.05$ ).

**Table S3.** Mean and standard deviation (Mean  $\pm$  SD), and minimum (Min) and maximum (Max) of Ni, Sr, Ti and Zn determined in Freisa wines from Asti (FA), Chieri (FC), Colli Tortonesi (CTF), Langhe (LF) and Monferrato (MF) sites. All values are expressed in  $\mu\text{g/L}$ .

| Site     |               | Ni                        | Sr                         | Ti                           | Zn                         |
|----------|---------------|---------------------------|----------------------------|------------------------------|----------------------------|
| FA       | Mean $\pm$ SD | 118 <sup>a</sup> $\pm$ 9  | 258 <sup>bc</sup> $\pm$ 70 | 8.6 <sup>a</sup> $\pm$ 3.1   | 244 <sup>a</sup> $\pm$ 131 |
|          | Min – Max     | 102 – 138                 | 171 – 373                  | 4.6 – 14.8                   | 46 – 467                   |
| FC       | Mean $\pm$ SD | 120 <sup>a</sup> $\pm$ 12 | 193 <sup>c</sup> $\pm$ 70  | 7.2 <sup>a</sup> $\pm$ 1.7   | 245 <sup>a</sup> $\pm$ 151 |
|          | Min – Max     | 106 – 137                 | 71 – 327                   | 5.0 – 9.8                    | 45 – 537                   |
| CTF      | Mean $\pm$ SD | 124 <sup>a</sup> $\pm$ 19 | 811 <sup>a</sup> $\pm$ 215 | 20.0 <sup>a</sup> $\pm$ 25.0 | 318 <sup>a</sup> $\pm$ 144 |
|          | Min – Max     | 106 – 159                 | 491 – 1117                 | 5.8 – 70.0                   | 89 – 530                   |
| LF       | Mean $\pm$ SD | 121 <sup>a</sup> $\pm$ 9  | 280 <sup>bc</sup> $\pm$ 94 | 11.7 <sup>a</sup> $\pm$ 15.9 | 312 <sup>a</sup> $\pm$ 147 |
|          | Min – Max     | 104 – 133                 | 154 – 447                  | 4.4 – 63.5                   | 70 – 622                   |
| MF       | Mean $\pm$ SD | 125 <sup>a</sup> $\pm$ 15 | 327 <sup>b</sup> $\pm$ 164 | 14.8 <sup>a</sup> $\pm$ 11.5 | 91 <sup>b</sup> $\pm$ 74   |
|          | Min – Max     | 112 – 161                 | 145 – 667                  | 5.5 – 38.5                   | 30 – 229                   |
| <i>F</i> |               | n.s.                      | 29.224 ***                 | n.s.                         | 4.287 **                   |

\*\*\* Significant for  $p < 0.001$ ; \*\* Significant for  $p < 0.01$ ; \* Significant for  $p < 0.05$ ; ° Significant for  $p < 0.1$ ; n.s.: not significant. F: calculated Fischer's F. Data followed by different letters in the same column are significantly different (LSD test at  $p \leq 0.05$ ).

**Table S4:** Element concentrations in Freisa wines from our study and in other red wines from other Italian regions.

|         |                    | Our study<br>Freisa<br>(Piedmont)<br>(n=55) | Bronzi et al.<br>(2020)<br>Chianti<br>(Tuscany)<br>(n=125) | Blotevogel et al.<br>(2019)<br>DOP Chianti<br>(Tuscany)<br>(n=2) | Blotevogel et al.<br>(2019)<br>Red wine<br>from Tuscany<br>(n=3) | Blotevogel et al.<br>(2019)<br>Red wine<br>from Liguria<br>(n=3) | Monaci et al.,<br>(2003)<br>Chianti Classico<br>(Tuscany)<br>(n=13) | Monaci et al.,<br>(2003)<br>Chianti<br>(Tuscany)<br>(n=13) | Monaci et al.,<br>(2003)<br>Cabernet S.<br>(Veneto)<br>(n=13) |
|---------|--------------------|---------------------------------------------|------------------------------------------------------------|------------------------------------------------------------------|------------------------------------------------------------------|------------------------------------------------------------------|---------------------------------------------------------------------|------------------------------------------------------------|---------------------------------------------------------------|
| Element | Unit               | Mean (min - max)                            | min - max                                                  | Mean (min - max)                                                 | Mean (min - max)                                                 | Mean (min - max)                                                 | Mean                                                                | Mean                                                       | Mean                                                          |
| Al      | µg L <sup>-1</sup> | 346 (112 – 676)                             |                                                            |                                                                  |                                                                  |                                                                  | 380                                                                 | 360                                                        | 220                                                           |
| Ba      | µg L <sup>-1</sup> | 58 (24 – 128)                               | 120 – 240                                                  | 191 (53 – 329)                                                   | 80 (30 – 140)                                                    | 100 (48 – 173)                                                   | 110                                                                 | 80                                                         | 100                                                           |
| Ca      | mg L <sup>-1</sup> | 46 (28 – 75)                                |                                                            | 71 (65 – 76)                                                     | 69 (51 – 87)                                                     | 63 (54 – 73)                                                     | 87.5                                                                | 85.9                                                       | 106                                                           |
| Cr      | µg L <sup>-1</sup> | 143 (122 – 167)                             |                                                            |                                                                  |                                                                  |                                                                  | 12.0                                                                | 12.4                                                       | 17.5                                                          |
| Cu      | µg L <sup>-1</sup> | 411 (222 – 720)                             |                                                            |                                                                  |                                                                  |                                                                  | 170                                                                 | 210                                                        | 40                                                            |
| Fe      | mg L <sup>-1</sup> | 2.1 (1.2 – 12.5)                            | 0.98 – 1.37                                                |                                                                  |                                                                  |                                                                  | 4.93                                                                | 3.41                                                       | 2.68                                                          |
| Mg      | mg L <sup>-1</sup> | 53 (41 – 77)                                | 99.1 – 101                                                 | 108 (95 – 121)                                                   | 99 (56 – 141)                                                    | 96 (93 – 102)                                                    | 93.3                                                                | 79.9                                                       | 69.4                                                          |
| Mn      | mg L <sup>-1</sup> | 0.6 (0.2 – 1.0)                             | 0.86 – 0.94                                                | 0.85 (0.64 – 1.06)                                               | 0.93 (0.80 – 1.14)                                               | 0.94 (0.58 – 1.36)                                               | 0.86                                                                | 0.75                                                       | 1.01                                                          |
| Na      | mg L <sup>-1</sup> | 8 (2 – 42)                                  | 11.3 – 12.3                                                |                                                                  |                                                                  |                                                                  | 9.18                                                                | 10.4                                                       | 6.95                                                          |
| Ni      | µg L <sup>-1</sup> | 121 (102 – 161)                             | 9.28 – 16.0                                                |                                                                  |                                                                  |                                                                  | 27.7                                                                | 29.3                                                       | 20.6                                                          |
| P       | mg L <sup>-1</sup> | 131 (71 – 202)                              |                                                            |                                                                  |                                                                  |                                                                  | 150                                                                 | 151                                                        | 100                                                           |
| Rb      | mg L <sup>-1</sup> | 2.3 (0.9 – 4.0)                             | 2.85 – 3.22                                                |                                                                  |                                                                  |                                                                  |                                                                     |                                                            |                                                               |
| Sr      | mg L <sup>-1</sup> | 0.33 (0.07 – 1.12)                          | 0.53 – 0.67                                                | 0.70 (0.70 – 0.71)                                               | 0.54 (0.36 – 0.77)                                               | 0.77 (0.52 – 0.91)                                               | 0.43                                                                | 0.48                                                       | 0.80                                                          |
| Ti      | µg L <sup>-1</sup> | 11.6 (4.4 – 69.1)                           | 13.6 – 14.3                                                |                                                                  |                                                                  |                                                                  | 20.1                                                                | 10.6                                                       | 9.20                                                          |
| Zn      | µg L <sup>-1</sup> | 243 (30 – 622)                              |                                                            |                                                                  |                                                                  |                                                                  | 580                                                                 | 690                                                        | 6100                                                          |

|         |                    | Our study<br>Freisa<br>(Piedmont)<br>(n=55) | Potorti et al.<br>(2016)<br>Nero d'Avola<br>(Sicily)<br>(n=39) | Potorti et al.<br>(2016)<br>Syrah<br>(Sicily)<br>(n=34) | Marengo et al.<br>(2003)<br>Red wine<br>from Piedmont<br>(n=68) | Galgano et al.<br>(2008)<br>Red wine<br>(Basilicata)<br>(n=40) | Galgano et al.<br>(2008)<br>Red wine<br>(Calabria)<br>(n=40) | Galgano et al.<br>(2008)<br>Red wine<br>(Campania)<br>(n=40) |
|---------|--------------------|---------------------------------------------|----------------------------------------------------------------|---------------------------------------------------------|-----------------------------------------------------------------|----------------------------------------------------------------|--------------------------------------------------------------|--------------------------------------------------------------|
| Element | Unit               | Mean (min - max)                            | Mean (min - max)                                               | Mean (min - max)                                        | min - max                                                       | Mean                                                           | Mean                                                         | Mean                                                         |
| Al      | µg L <sup>-1</sup> | 346 (112 – 676)                             |                                                                |                                                         | 210 – 1,770                                                     | 893                                                            | 1,550                                                        | 1,260                                                        |
| Ba      | µg L <sup>-1</sup> | 58 (24 – 128)                               |                                                                |                                                         |                                                                 | 176                                                            | 123                                                          | 188                                                          |
| Ca      | mg L <sup>-1</sup> | 46 (28 – 75)                                | 124 (68 – 217)                                                 | 110 (75 – 163)                                          | 30 – 90                                                         | 83.17                                                          | 73.32                                                        | 70.27                                                        |
| Cr      | µg L <sup>-1</sup> | 143 (122 – 167)                             | 35 (10 – 106)                                                  | 18 (10 – 30)                                            | 20 – 50                                                         | 16.98                                                          | 19.68                                                        | 14.67                                                        |
| Cu      | µg L <sup>-1</sup> | 411 (222 – 720)                             | 289 (121 – 1,525)                                              | 744 (139 – 1,820)                                       | 1 – 1,340                                                       | 150                                                            | 249                                                          | 95.86                                                        |
| Fe      | mg L <sup>-1</sup> | 2.1 (1.2 – 12.5)                            | 4.7 (1.0 – 9.4)                                                | 4.7 (2.4 – 9.6)                                         | 1.35 – 27.8                                                     | 3.91                                                           | 3.92                                                         | 2.60                                                         |
| Mg      | mg L <sup>-1</sup> | 53 (41 – 77)                                | 122 (100 – 152)                                                | 159 (126 – 224)                                         | 70 – 115                                                        | 102.35                                                         | 116.70                                                       | 88.25                                                        |
| Mn      | mg L <sup>-1</sup> | 0.6 (0.2 – 1.0)                             | 1.3 (0.5 – 1.9)                                                | 1.2 (0.7 – 1.8)                                         | 0.67 – 2.50                                                     | 1.63                                                           | 1.53                                                         | 1.04                                                         |
| Na      | mg L <sup>-1</sup> | 8 (2 – 42)                                  | 41 (10 – 205)                                                  | 37 (11 – 101)                                           | 3.4 – 200                                                       | 20.97                                                          | 28.47                                                        | 18.70                                                        |
| Ni      | µg L <sup>-1</sup> | 121 (102 – 161)                             | 67 (17 – 203)                                                  | 28 (10 – 53)                                            | 15 – 210                                                        | 40.55                                                          | 54.57                                                        | 35.72                                                        |
| P       | mg L <sup>-1</sup> | 131 (71 – 202)                              |                                                                |                                                         | 280 – 630                                                       | 171                                                            | 193                                                          | 162                                                          |
| Rb      | mg L <sup>-1</sup> | 2.3 (0.9 – 4.0)                             |                                                                |                                                         | 0.6 – 2.3                                                       | 2.29                                                           | 2.18                                                         | 3.79                                                         |
| Sr      | mg L <sup>-1</sup> | 0.33 (0.07 – 1.12)                          |                                                                |                                                         | 0.32 – 2.40                                                     | 1.34                                                           | 1.86                                                         | 1.11                                                         |
| Ti      | µg L <sup>-1</sup> | 11.6 (4.4 – 69.1)                           |                                                                |                                                         | 0.10 – 0.55                                                     | 20.41                                                          | 27.27                                                        | 20.31                                                        |
| Zn      | µg L <sup>-1</sup> | 243 (30 – 622)                              | 6,607 (3,801 – 11,793)                                         | 3,571 (1,234 – 6,571)                                   | 135 – 4,800                                                     | 560                                                            | 720                                                          | 600                                                          |
